# Supplementary material for: An efficient method to make human monoclonal antibodies from memory B cells: potent neutralization of SARS coronavirus
Source: Springer Nature journal article supplement (doi:10.1038/nm1080), 2004-07-11
Supplement: 41591_2004_BFnm1080_MOESM1_ESM.pdf [file 41591_2004_BFnm1080_MOESM1_ESM.pdf]

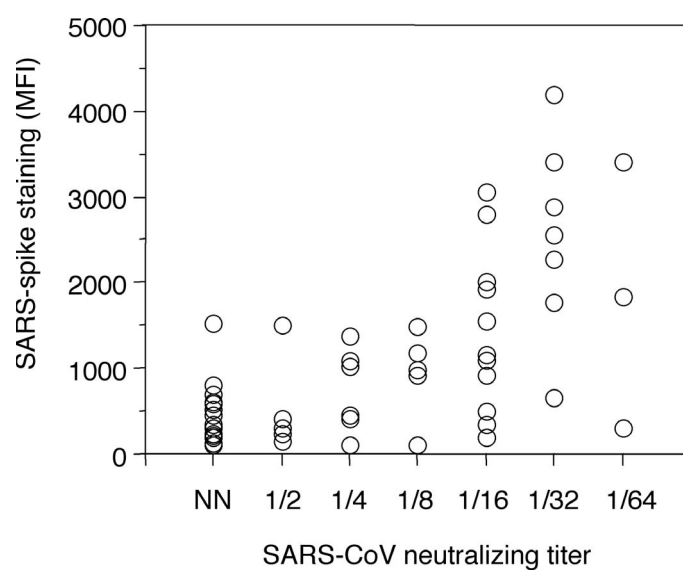

**Supplementary Figure 1.** Clonal analysis of the human antibody response to the SARS-CoV spike protein. Culture supernatants were tested for their capacity to stain BHK cells transfected with SARS-CoV spike mRNA (Frankfurt isolate) and for their *in vitro* neutralizing titer against the same virus. Shown is the correlation between neutralizing titer and staining of spike protein by undiluted culture supernatant. NN, non neutralizing
