# Supplementary material for: An efficient method to make human monoclonal antibodies from memory B cells: potent neutralization of SARS coronavirus
Source: Springer Nature journal article supplement (doi:10.1038/nm1080), 2004-07-11
Supplement: 41591_2004_BFnm1080_MOESM2_ESM.pdf [file 41591_2004_BFnm1080_MOESM2_ESM.pdf]

**Supplementary Table 1.** Detection of antibodies to SARS-CoV in convalescent serum.

| Months<br>after infection | SARS-CoV Ab detected by |                             |                             |
|---------------------------|-------------------------|-----------------------------|-----------------------------|
|                           | ELISA <sup>1</sup>      | Spike staining <sup>1</sup> | Neutralization <sup>2</sup> |
| 2                         | 1000                    | 1000                        | 1/128                       |
| 4                         | 650                     | 700                         | 1/128                       |
| 6                         | 300                     | 400                         | 1/128                       |
| 8                         | 120                     | 250                         | 1/128                       |
| Healthy donors<br>(n=20)  | <2                      | <1                          | nd                          |

<sup>1</sup>A standard curve was constructed using the 2 months serum. Values are expressed as arbitrary units relative to the 2 months sample (=1000AU). Only IgG1, but no IgA or IgM antibodies were detected in these assays using isotype specific reagents. nd, not detectable

<sup>2</sup>Serum dilution neutralizing 75 TCID<sub>50</sub> of SARS-CoV.

|
